# Supplementary material for: Benefits of a robotic chamber system for determining evapotranspiration in an erosion-affected, heterogeneous cropland
Source: Copernicus journal article supplement (doi:10.5194/hess-27-3851-2023), 2023-11-01
Supplement: Supplementary file 1 [file hess-27-3851-2023-supplement.pdf]

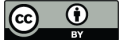

*Supplement of*

## **Benefits of a robotic chamber system for determining evapotranspiration in an erosion-affected, heterogeneous cropland**

**Adrian Dahlmann et al.**

*Correspondence to:* Adrian Dahlmann ([adrian.dahlmann@zalf.de](mailto:adrian.dahlmann@zalf.de))

The copyright of individual parts of the supplement might differ from the article licence.

Supplement:

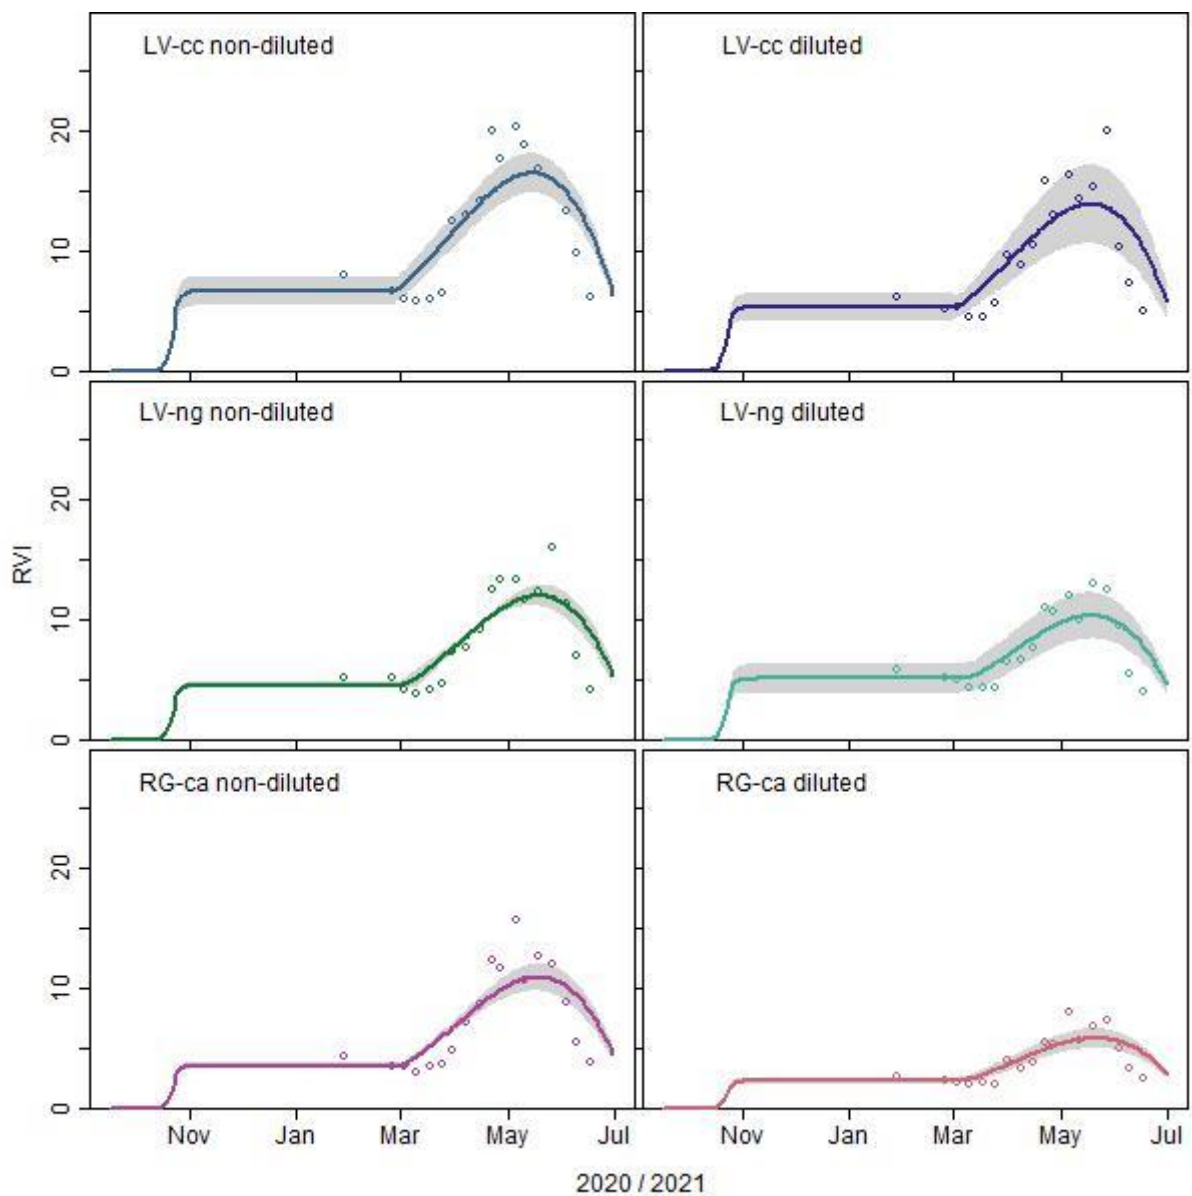

**Figure S1:** RVI fit (colored lines) of the different treatments with the standard deviation between replicates (light gray) and the corresponding averages of the daily measurements (points).

5

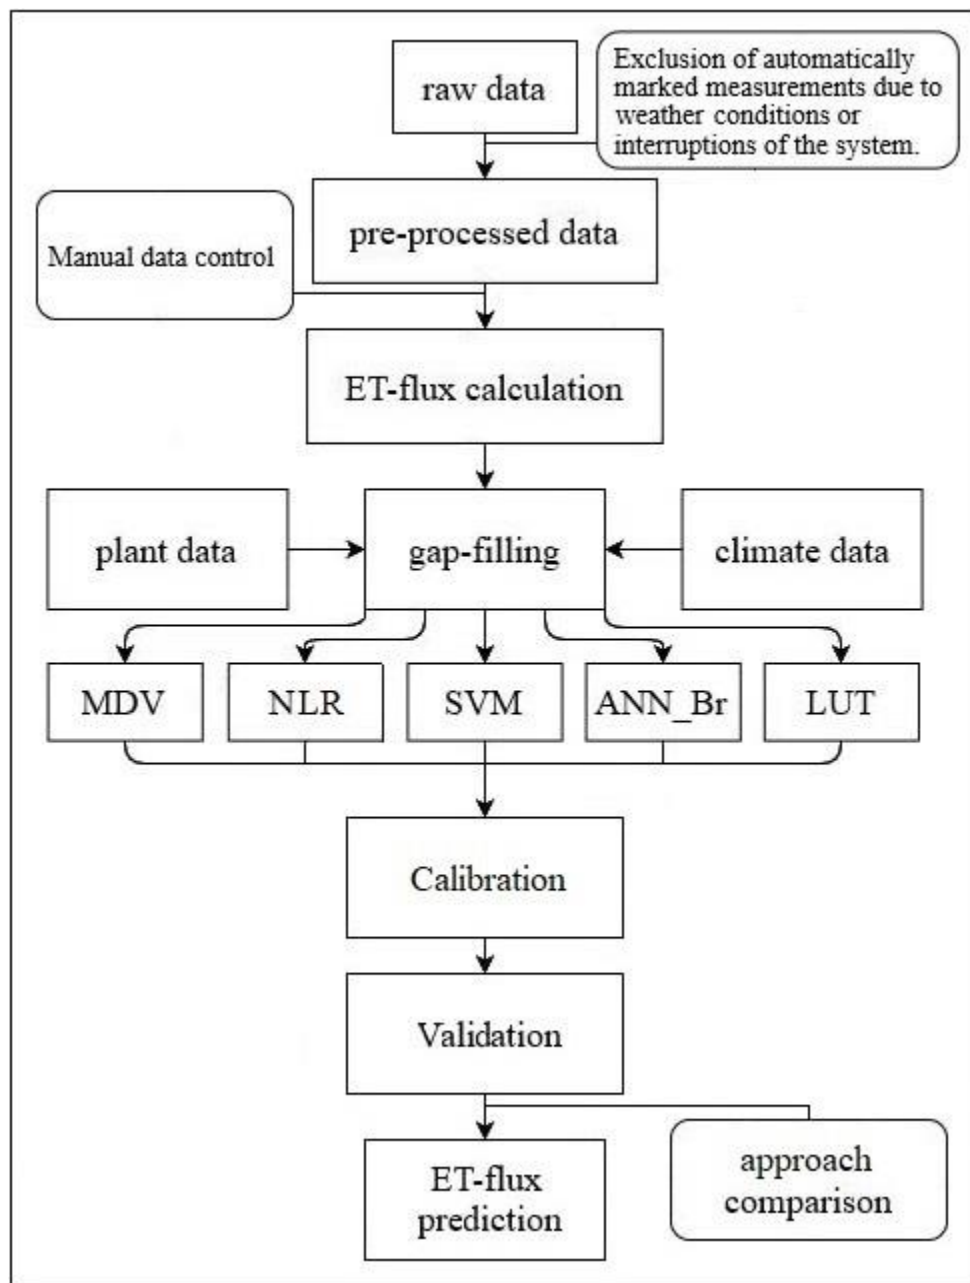

**Figure S2:** Schematic representation of the main steps of the presented data processing: raw data preparation was followed by a campaign-specific ET-flux calculation. Then, environmental parameters were used for modeling using five different approaches. After calibration and validation, the most accurate approach was used for ET flux modeling.

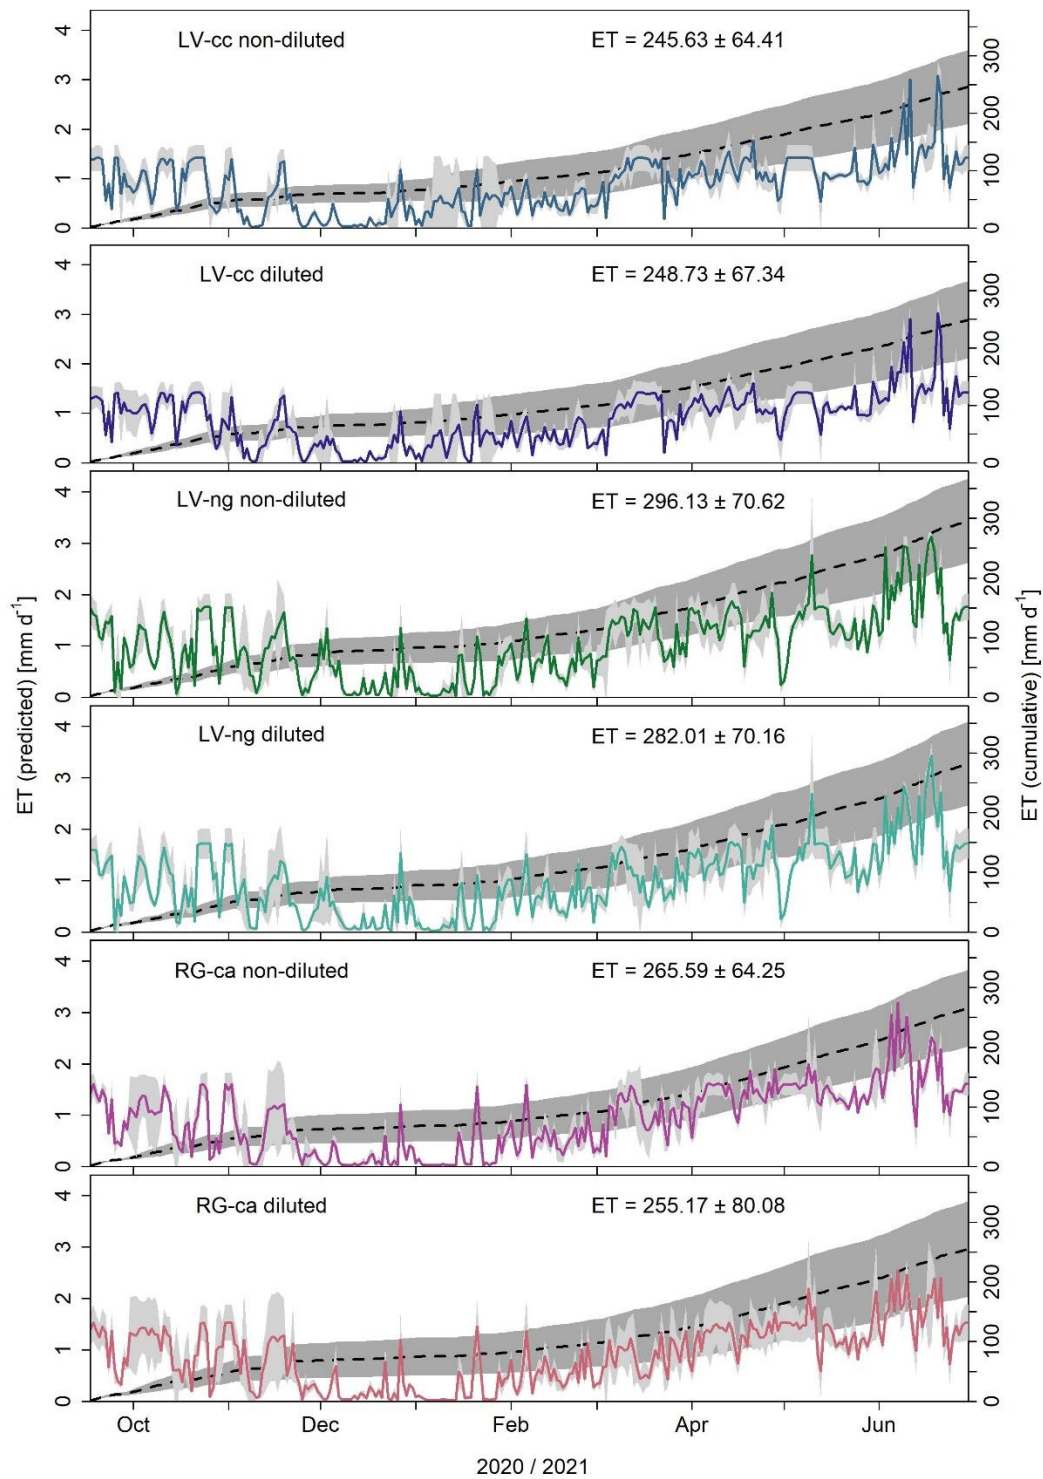

**Figure S3:** LUT predicted daily mean ET sums (colored lines) of the different treatments and seasonal cumulative ET ( $ET_{sum}$ ; dashed lines) with standard deviation between replicates (light and dark gray).

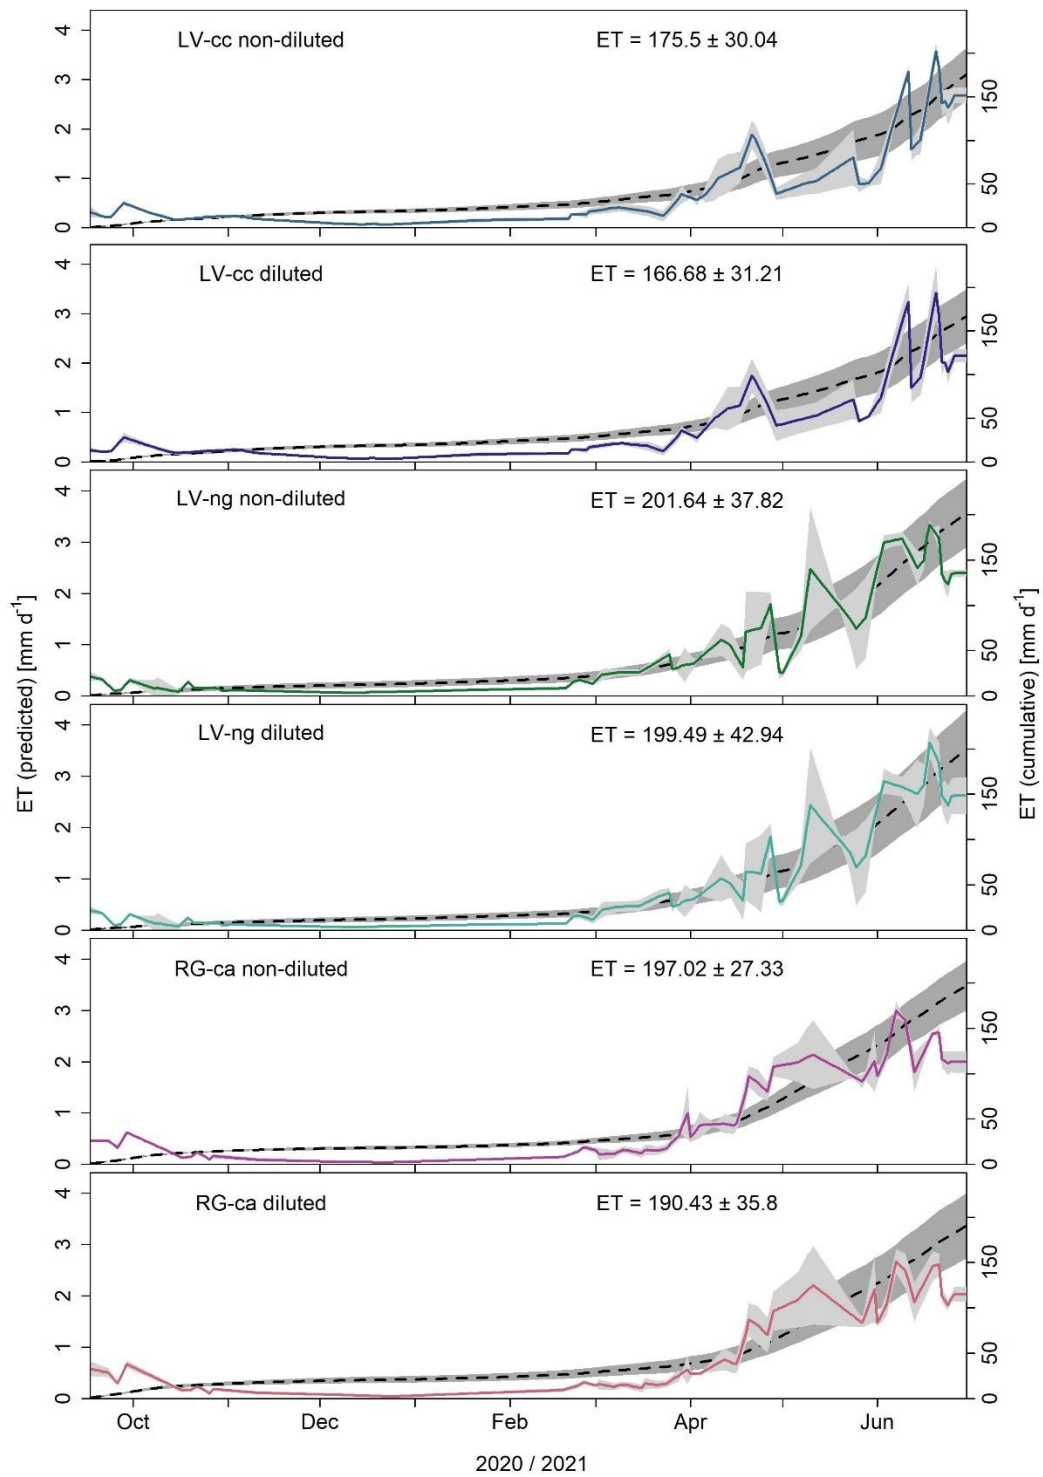

**Figure S4:** MDV predicted daily mean ET sums (colored lines) of the different treatments and seasonal cumulative ET (ET<sub>sum</sub>; dashed lines) with standard deviation between replicates (light and dark gray).

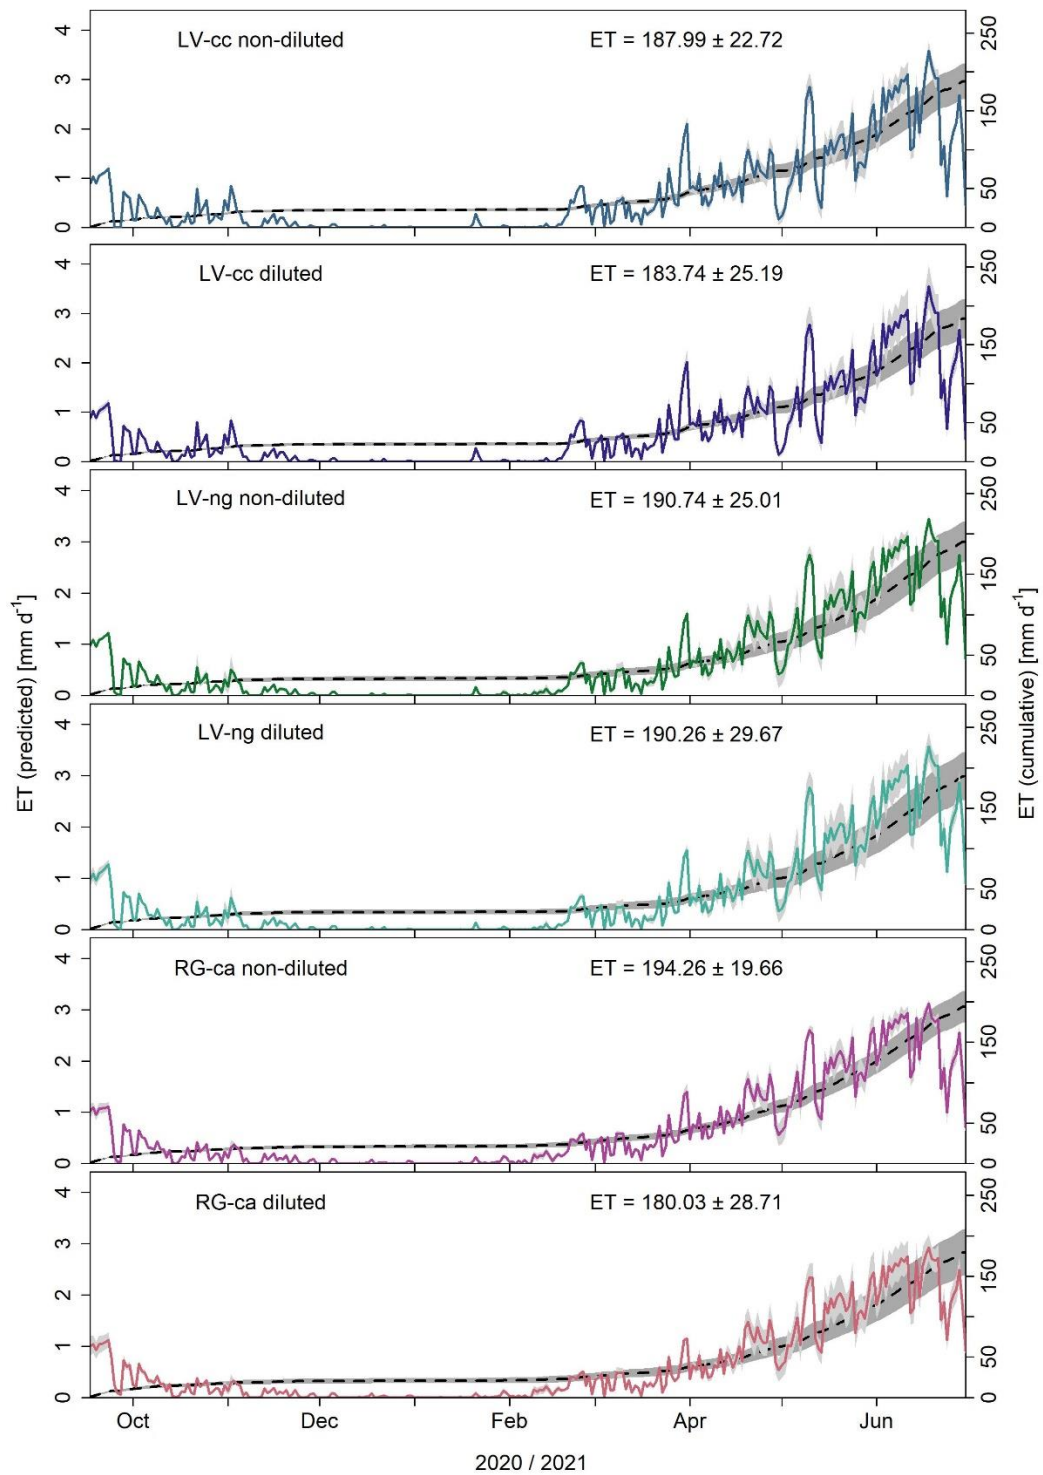

**Figure S5:** NLR predicted daily mean ET sums (colored lines) of the different treatments and seasonal cumulative ET ( $ET_{sum}$ ; dashed lines) with standard deviation between replicates (light and dark gray).



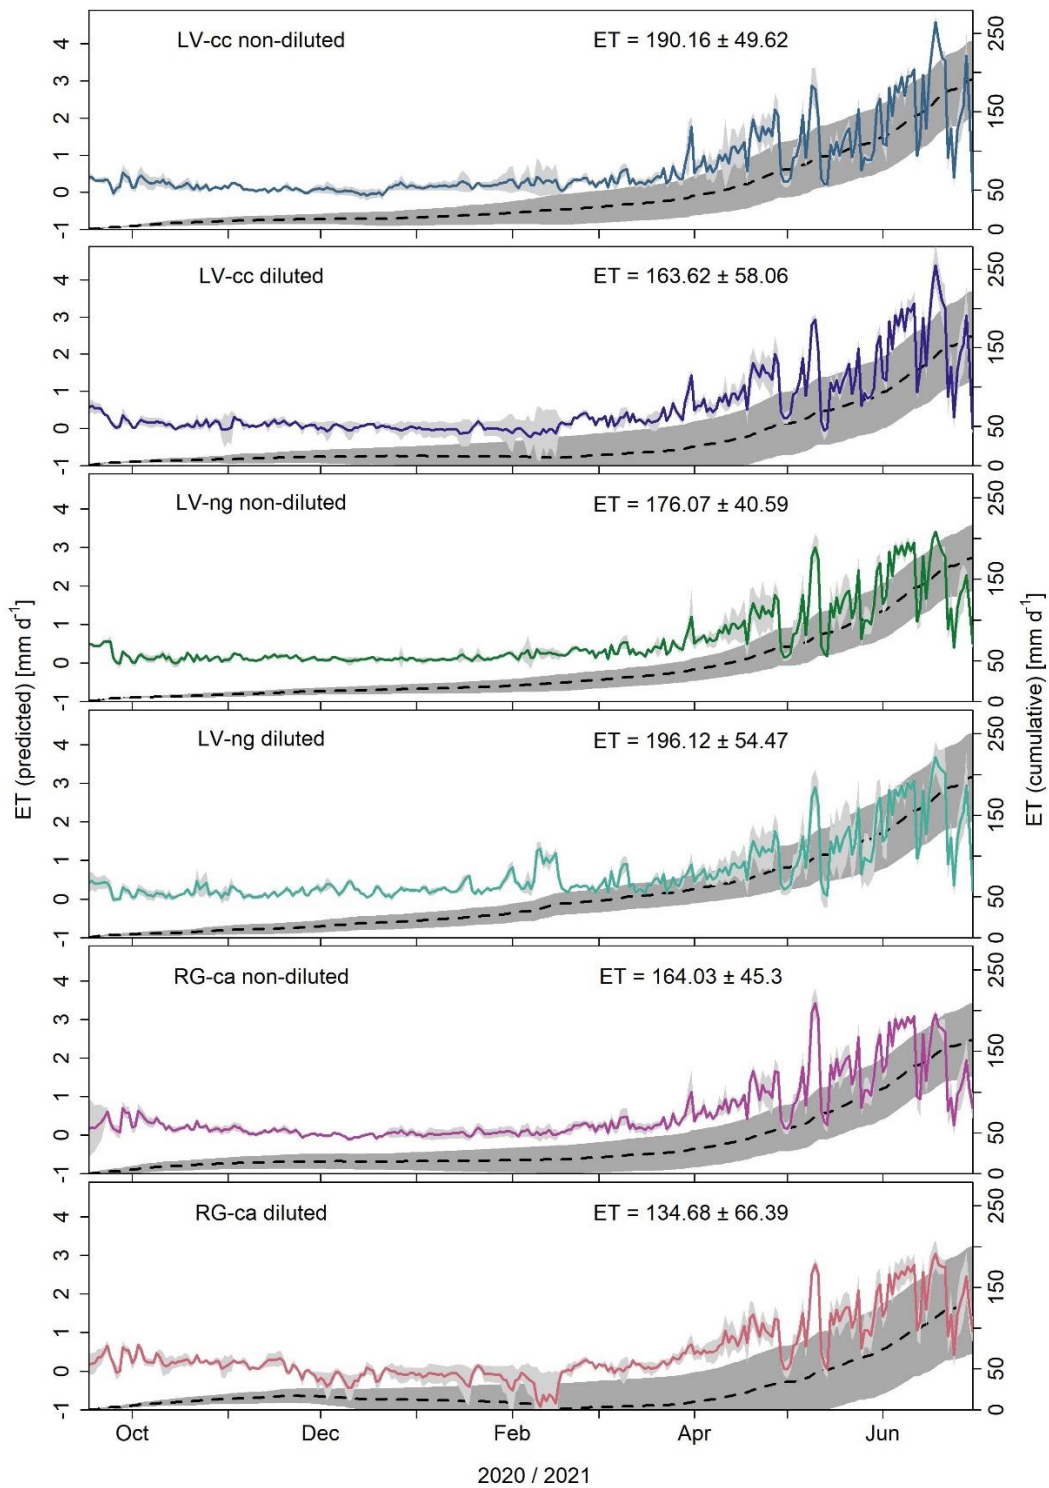

25

**Figure S6:** ANN\_BR predicted daily mean ET sums (colored lines) of the different treatments and seasonal cumulative ET ( $ET_{sum}$ ; dashed lines) with standard deviation between replicates (light and dark gray).

**Table S1:** Fertilization information for the field.

| Date       | Amount                                                | Details                                      |
|------------|-------------------------------------------------------|----------------------------------------------|
| 15.10.2020 | 161 kg P <sub>2</sub> O <sub>5</sub> ha <sup>-1</sup> | applied on 6 plots of LL as TSP              |
| 22.03.2020 | 77 kg P <sub>2</sub> O <sub>5</sub> ha <sup>-1</sup>  | as Triple Super Phosphate (TSP)              |
| 22.03.2020 | 259 kg K <sub>2</sub> O ha <sup>-1</sup>              | as 40% grain potash                          |
| 16.09.2020 | 30 kg N ha <sup>-1</sup>                              | 10 m <sup>3</sup> ha <sup>-1</sup> digestate |
| 10.03.2021 | 91 kg N ha <sup>-1</sup>                              | 30 m <sup>3</sup> ha <sup>-1</sup> digestate |
| 08.04.2021 | 45 kg N ha <sup>-1</sup>                              | 12 m <sup>3</sup> ha <sup>-1</sup> digestate |

**Table S2:** The number of measurements per treatment and the percentage of modeling data.

| Plot      |   | Measurements [n] | modelled [%] |
|-----------|---|------------------|--------------|
| LV-cc n-d | 1 | 990              | 85.63        |
| LV-cc n-d | 2 | 624              | 90.94        |
| LV-cc n-d | 3 | 996              | 85.54        |
| LV-cc d   | 1 | 624              | 90.94        |
| LV-cc d   | 2 | 735              | 89.33        |
| LV-cc d   | 3 | 989              | 85.64        |
| LV-ng n-d | 1 | 1210             | 82.43        |
| LV-ng n-d | 2 | 1210             | 82.43        |
| LV-ng n-d | 3 | 705              | 89.76        |
| LV-ng d   | 1 | 718              | 89.58        |
| LV-ng d   | 2 | 1215             | 82.36        |
| LV-ng d   | 3 | 1205             | 82.51        |
| RG-ca n-d | 1 | 657              | 90.46        |
| RG-ca n-d | 2 | 772              | 88.79        |
| RG-ca n-d | 3 | 669              | 90.29        |
| RG-ca d   | 1 | 669              | 90.29        |
| RG-ca d   | 2 | 1130             | 83.59        |
| RG-ca d   | 3 | 1129             | 83.61        |



45

**Table S3:** Used R packages and associated sources.

|    | <b>package</b> | <b>source</b>                      |
|----|----------------|------------------------------------|
|    | Akima          | Akima & Gebhardt (2021)            |
|    | Andrews        | Myslivec (2012)                    |
|    | Base           | R Core Team (2021)                 |
| 50 | Boot           | Davison & Hinkley (1997)           |
|    | Caret          | Kuhn (2021)                        |
|    | data.table     | Dowle & Srinivasan (2021)          |
|    | e1071          | Meyer et al. (2021)                |
|    | FSA            | Ogle et al. (2022)                 |
|    | ggplot2        | Wickham (2016)                     |
| 55 | gridExtra      | Auguie (2017)                      |
|    | gt             | Iannone et al. (2022)              |
|    | hydroGOF       | Mauricio Zambrano-Bigiarini (2020) |
|    | Kernlab        | Karatzoglou et al. (2004)          |
|    | Latrice        | Sarkar (2008)                      |
|    | Lmtest         | Zeileis & Hothorn (2002)           |
| 60 | lookupTable    | Jia & Maier (2015)                 |
|    | Lubridate      | Grolemund & Wickham (2011)         |
|    | Neuralnet      | Fritsch et al. (2019)              |
|    | Nortest        | Gross & Ligges (2015)              |
|    | Plotrix        | J (2006)                           |
|    | Plyr           | Wickham (2011)                     |
| 65 | Reshape        | Wickham (2007)                     |
|    | Shape          | Soetaert (2021)                    |
|    | Tibble         | Müller & Wickham (2021)            |
|    | tidyr          | Wickham & Girlich (2022)           |
|    | Vioplot        | Adler & Kelly (2020)               |
|    | webshot        | Chang (2022)                       |
| 70 | Zoo            | Zeileis & Grothendieck (2005)      |

75

**Table S4:** Calibration mean error (ME) for different ranges of ET fluxes (less than 2, between 2 and 4 and greater than 4 mmol m<sup>-2</sup> s<sup>-1</sup>) for all modeling approaches.

| <b>Approach</b> | <b>&lt; 2</b> | <b>2 - 4</b> | <b>&gt; 4</b> |
|-----------------|---------------|--------------|---------------|
| SVM             | -0.05         | 0.05         | 0.4           |
| MDV             | -0.03         | 0.06         | 0.29          |
| ANN_BR          | -0.03         | 0.08         | 0.33          |
| NLR             | -0.2          | 0.39         | 1.14          |
| LUT             | -0.01         | 0.01         | 0.12          |
